# Supplementary material for: Hyaluronic Acid-Coated Bovine Milk Exosomes for Achieving Tumor-Specific Intracellular Delivery of miRNA-204
Source: MDPI journal article supplement (doi:10.3390/cells11193065), 2022-09-29
Supplement: s1 [file s1]

# Supplementary Material

**Table S1.** List of miRNAs used in this study.

| Name                               | Sequences (5' to 3') |                                     |
|------------------------------------|----------------------|-------------------------------------|
| miRNA-204 mimic<br>(5' FAM-tag)    | Sense                | 5'-UUC CCU UUG UCA UCC UAU GCC U-3' |
|                                    | Antisense            | 5'-A GGC AUA GGA UGA CAA AGG GAA-3' |
| random miRNA<br>(Negative Control) | Sense                | 5'-UUC UCC GAA CGU GUC ACG UTT-3'   |
|                                    | Antisense            | 5'-ACG UGA CAC GUU CGG AGA ATT-3'   |

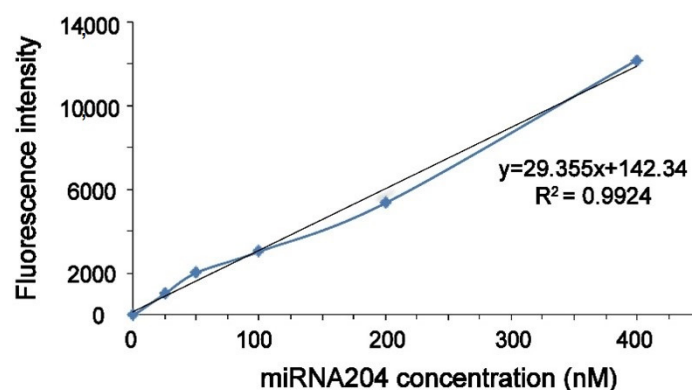

**Figure S1.** Standard curve of miR-204 concentration versus the corresponding fluorescence intensity.

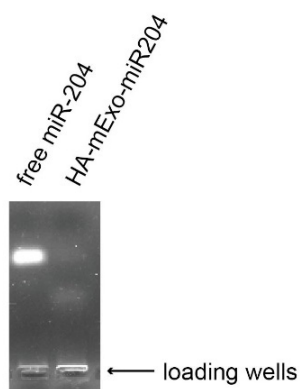

**Figure S2.** Agarose gel electrophoresis of free miRNA-204 and HA-mExo-miR204.

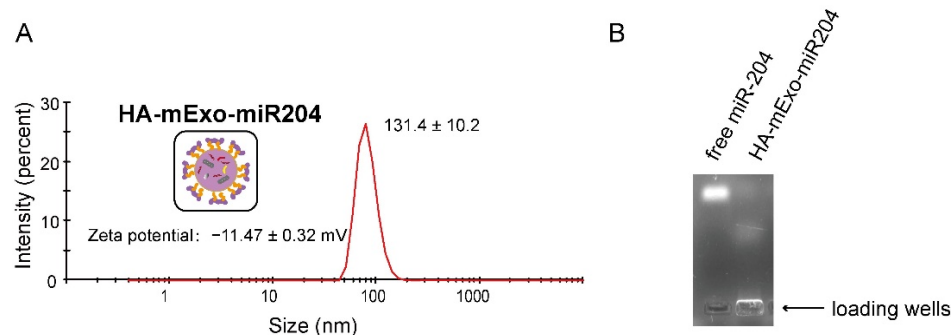

**Figure S3.** Storage stability of HA-mExo-miR204. DLS analysis (A) and agarose gel electrophoresis (B) of HA-mExo-miR204 after storage at  $-20^{\circ}\text{C}$  for 7 days.

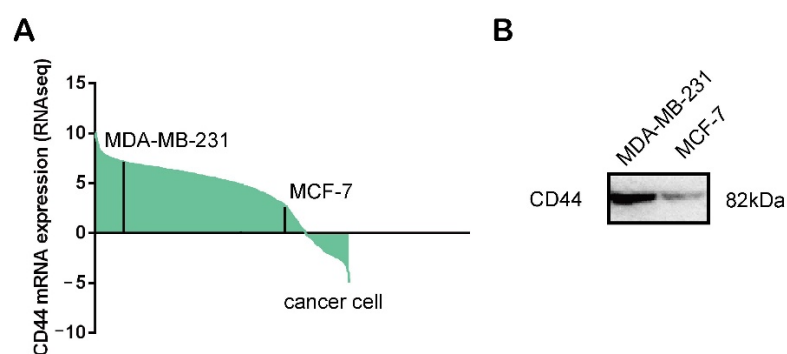

**Figure S4.** CD44 expression in cancer cells. (A) Relative expression of CD44 mRNA in MDA-MB-231 and MCF-7 cancer cell lines. (B) Western blot analysis of CD44 protein expression in MDA-MB-231 and MCF-7 cancer cell lines.

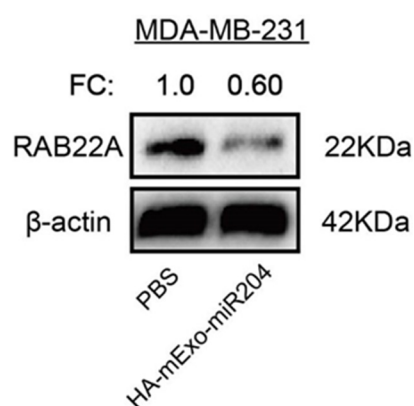

**Figure S5.** Western blotting analysis of RAB22A expression. MDA-MB-231 cells were treated with PBS or HA-mExo-miR204 for 12 h.

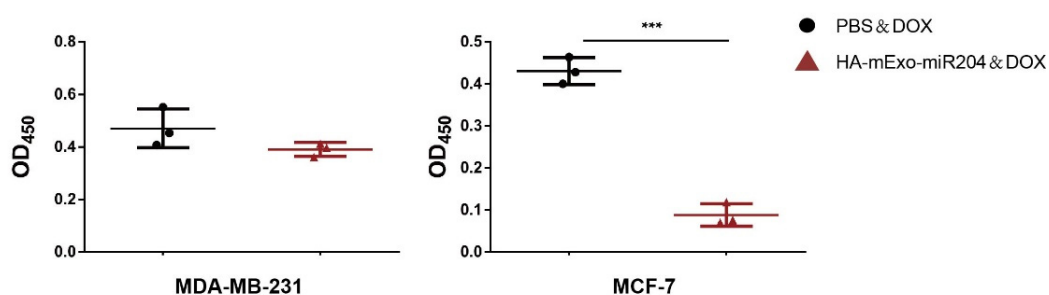

**Figure S6.** The effect of HA-mExo-miR204 on the chemosensitivity of Dox. Cancer cells were treated with PBS or HA-mExo-miR204 in combination with Dox for 12 h and the effect of HA-mExo-miR204 on Dox chemosensitivity was determined by CCK-8 cell viability assay. \*\*\*  $p < 0.001$ .

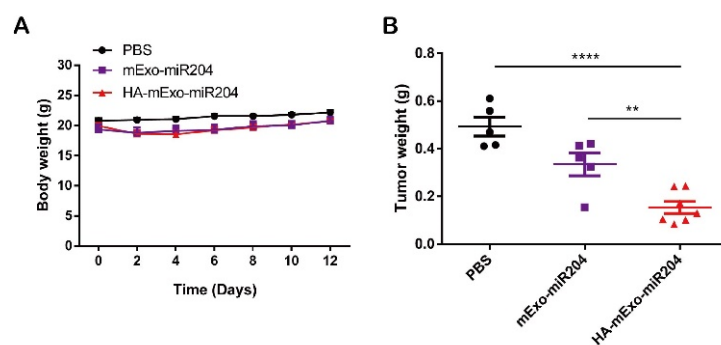

**Figure S7.** Body weight and tumor weight of mice. (A) Body-weight of tumor-bearing mice during the therapeutic course. (B) Endpoint tumor weight the mice after 12-days treatments. \*\*  $p < 0.01$ , \*\*\*\*  $p < 0.0001$ .

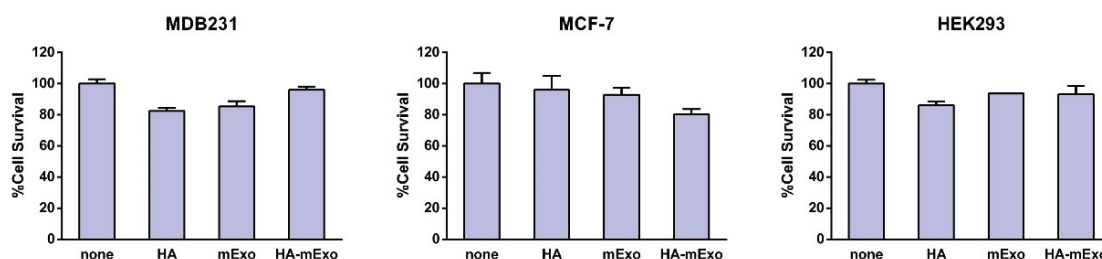

**Figure S8.** Cytotoxicity of DSPE-PEG<sub>2000</sub>-HA, mExos and HA-mExos. MDA-MB-231, MCF-7 and HEK293 cells were incubated with DSPE-PEG<sub>2000</sub>-HA, mExos or HA-mExos, respectively. After 48 h, cell viability was determined by CCK-8 assay.

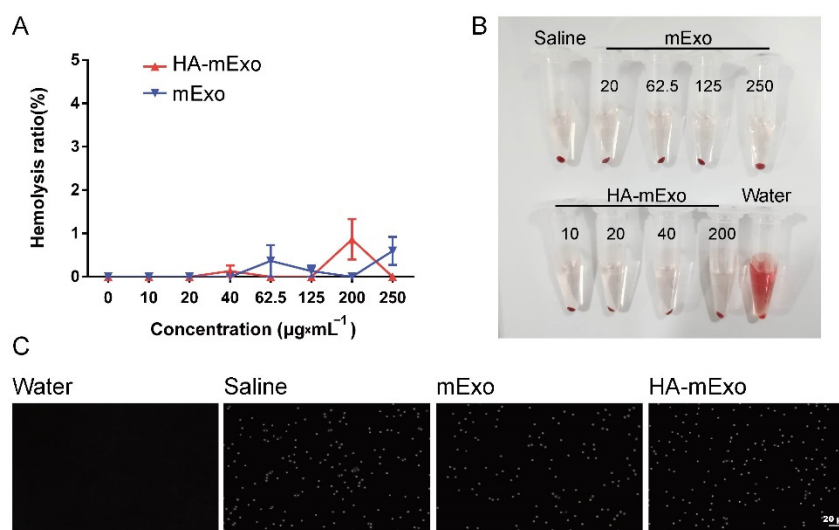

**Figure S9.** In vitro hemocompatibility of mExos and HA-mExos. (A) Hemolysis ratio of mExos and HA-mExos. (B) The images of red blood cells after incubation with mExos and HA-mExos. (C) Microscopy analysis of red blood cell membrane integrity after incubation with mExos and HA-mExos. Scale bars: 20 µm.

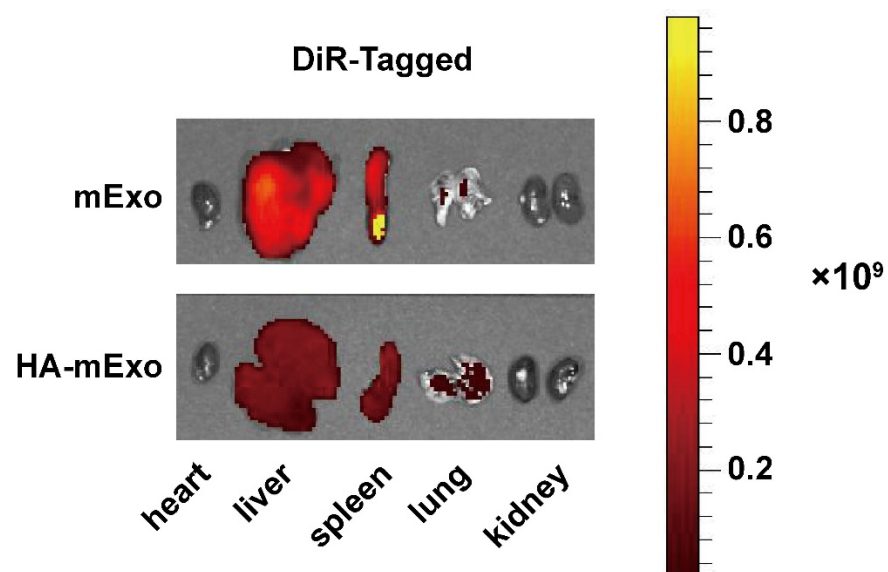

**Figure S10.** In vivo distribution of mExos and HA-mExos. The visualization of mExos and HA-mExos was achieved by labeling the exosomes with DiR dyes. Images of mice organs were recorded using an in vivo Fluorescence Image System (IVIS SPECTRUM, PerkinElmer, Waltham, MA, USA).
